# Supplementary material
Source: publisher site journal article supplement (https://static.cambridge.org/content/id/urn:cambridge.org:id:article:S1755773919000067/resource/name/S1755773919000067supp001.docx)
Supplement: Supplementary file 1 [file S1755773919000067supp001.docx]

**Appendix.**

**Table A1: comparison between sample and population**

|  |  | **Netherlands** | | |  | **Spain** | | |
| --- | --- | --- | --- | --- | --- | --- | --- | --- |
|  |  | **Population %** |  | **Sample %** |  | **Population** |  | **Sample** |
| **Gender** | Female | 50.46 |  | 54.97 |  | 50.86 |  | 49.84 |
|  | ale | 49.54 |  | 45.03 |  | 49.14 |  | 50.16 |
| **Age** | 18-24 | 12.40 |  | 9.04 |  | 14 |  | 13.9 |
|  | 25-34 | 17.20 |  | 17.78 |  | 22 |  | 22.03 |
|  | 35-44 | 30.10 |  | 31.29 |  | 25 |  | 24.95 |
|  | 45-54 | 21.50 |  | 22.32 |  | 22 |  | 22.1 |
|  | 55-64 | 18.80 |  | 19.56 |  | 17 |  | 17.03 |
| **Education NL[[1]](#footnote-1)** | Primary | 7 |  | 6.11 |  |  |  |  |
|  | Lower secondary | 16 |  | 16.81 |  |  |  |  |
|  | Upper secondary | 42 |  | 43.84 |  |  |  |  |
|  | Tertiary education | 35 |  | 32.11 |  |  |  |  |
|  | Don’t Know |  |  | 1.14 |  |  |  |  |
| **Education ES** | No education |  |  |  |  | 3 |  | 1.09 |
|  | Primary |  |  |  |  | 10 |  | 16.04 |
|  | Lower secondary |  |  |  |  | 30 |  | 27.29 |
|  | Upper secondary[[2]](#footnote-2) |  |  |  |  | 33 |  | 31.09 |
|  | University |  |  |  |  | 24 |  | 24.48 |
| **Region NL** | Groningen | 3.46 |  | 4.38 |  |  |  |  |
|  | Friesland | 3.82 |  | 3.95 |  |  |  |  |
|  | Drenthe | 2.89 |  | 3.35 |  |  |  |  |
|  | Overijssel | 6.75 |  | 6.65 |  |  |  |  |
|  | Gelderland | 11.99 |  | 11.41 |  |  |  |  |
|  | Flevoland | 2.38 |  | 2.59 |  |  |  |  |
|  | Utrecht | 7.48 |  | 6.97 |  |  |  |  |
|  | Noord-Holland | 16.34 |  | 14.43 |  |  |  |  |
|  | Zuid-Holland | 21.3 |  | 21.08 |  |  |  |  |
|  | Zeeland | 2.25 |  | 2.7 |  |  |  |  |
|  | Noord-Brabant | 14.73 |  | 14.49 |  |  |  |  |
|  | Limburg | 6.61 |  | 8 |  |  |  |  |
| **Region ES** | Andalucía |  |  |  |  | 18.15 |  | 12.81 |
|  | Aragón |  |  |  |  | 2.87 |  | 4.02 |
|  | Canarias (ES) |  |  |  |  | 4.59 |  | 3.97 |
|  | Cantabria |  |  |  |  | 1.26 |  | 1.62 |
|  | Castilla y León |  |  |  |  | 5.35 |  | 6.48 |
|  | Castilla-la Mancha |  |  |  |  | 4.46 |  | 5.7 |
|  | Cataluña |  |  |  |  | 15.98 |  | 16.1 |
|  | Comunidad de Madrid |  |  |  |  | 13.8 |  | 12.33 |
|  | Comunidad Foral de Navarra |  |  |  |  | 1.38 |  | 1.57 |
|  | Comunidad Valenciana |  |  |  |  | 10.67 |  | 10.87 |
|  | Extremadura |  |  |  |  | 2.36 |  | 2.56 |
|  | Galicia |  |  |  |  | 5.91 |  | 6.43 |
|  | Illes Balears |  |  |  |  | 2.43 |  | 2.67 |
|  | La Rioja |  |  |  |  | 0.68 |  | 0.89 |
|  | País Vasco |  |  |  |  | 4.68 |  | 5.44 |
|  | Principado de Asturias |  |  |  |  | 2.27 |  | 2.61 |
|  | Región de Murcia |  |  |  |  | 3.16 |  | 3.92 |

*Notes.*  Sources:Eurostat,OECD.

**Table A2: Descriptive statistics**

|  | Netherlands | | | |  | Spain | | | |
| --- | --- | --- | --- | --- | --- | --- | --- | --- | --- |
| Variable | Mean | Std. Dev. | Min | Max |  | Mean | Std. Dev. | Min | Max |
| Support unemployed | 0,14 | 0,34 | 0 | 1 |  | 0,31 | 0,46 | 0 | 1 |
| Age | 42,6 | 12,2 | 18 | 64 |  | 40,31 | 12,45 | 18 | 64 |
| Female | 0,55 | 0,50 | 0 | 1 |  | 0,50 | 0,50 | 0 | 1 |
| Education | 3,83 | 1,38 | 1 | 6 |  | 3,61 | 1,05 | 1 | 5 |
| EU attachment | 2,30 | 0,91 | 1 | 4 |  | 2,52 | 0,88 | 1 | 4 |
| EU identification (dichotomized) | 0,42 | 0,49 | 0 | 1 |  | 0,76 | 0,43 | 0 | 1 |
| Left right self placement | 5,28 | 2,41 | 0 | 10 |  | 3,76 | 2,44 | 0 | 10 |
| Inequality aversion (reversed) | 2.68 | 2.34 | 0 | 10 |  | 1.46 | 1.94 | 0 | 10 |
| Immigration attitudes | 7.1 | 2.73 | 0 | 10 |  | 5.49 | 3.51 | 0 | 10 |
| Extremism | 5.9 | 7.25 | 0 | 25 |  | 7.47 | 8.72 | 0 | 25 |
| National attachment | 3.18 | 0.81 | 1 | 4 |  | 2.99 | 0.94 | 1 | 4 |
| Unemployment | 0.18 | 0.38 | 0 | 1 |  | 0.25 | 0.43 | 0 | 1 |
| Income | 5.03 | 2.95 | 1 | 10 |  | 3.45 | 2.59 | 1 | 10 |

**Table A3:** **Treatment effects on willingness to support unemployed people, controlling for income and for being unemployed**

|  | Netherlands | | | |  | Spain | | | |
| --- | --- | --- | --- | --- | --- | --- | --- | --- | --- |
|  | M1 |  | M2 |  |  | M1 |  | M2 |  |
|  | Coef. | S.E. | Coef. | S.E. |  | Coef. | S.E. | Coef. | S.E. |
| Foreign | -1.636*** | 0.157 | -1.576*** | 0.170 |  | -1.287*** | 0.123 | -1.262*** |  |
| Unemployment | 0.115 | 0.211 |  |  |  | -0.385** | 0.146 |  |  |
| Income |  |  | -.031 | 0.031 |  |  |  | 0.119*** | 0.0267 |
| Age | -0.005 | .007 | -0.004 | 0.008 |  | 0.017** | 0.005 | 0.008 | 0.006 |
| Female | -0.555** | 0.161 | -0.583** | 0.178 |  | -0.679*** | 0.123 | -0.515*** | 0.138 |
| Education | 0.307*** | 0.065 | 0.391*** | 0.076 |  | 0.291*** | 0.062 | 0.205** | 0.071 |
| Constant | -1.657*** | 0.471 | -1.782** | 0.528 |  | -1.35*** | 0.384 | -1.199** | 0.427 |
| N | 1571 |  | 1241 |  |  | 1499 |  | 1189 |  |
| R2 | 0.122 |  | 0.126 |  |  | 0.100 |  | 0.100 |  |
| *Notes.* Logit regression. Two-tailed test, *p<0.05, **p<0.01, ***p<0.001. | | | | | | |  |  |  |

**Table A4: Effect of EU-attachment controlling for national attachment**

|  | Netherlands | |  | Spain | |
| --- | --- | --- | --- | --- | --- |
|  | Coef. | S.E. |  | Coef. | S.E. |
| Foreign | -2.619*** | 0.498 |  | -1.530*** | 0.388 |
| EU Attachment | 0.341** | 0.123 |  | 0.339** | 0.114 |
| Foreign x EU Attachment | 0.382* | 0.181 |  | 0.101 | 0.142 |
| National Attachment | 0.121 | 0.109 |  | -0.167* | 0.070 |
| Age | -0.006 | 0.007 |  | 0.017** | 0.005 |
| Female | -0.628*** | 0.164 |  | -0.719*** | 0.127 |
| Education | 0.253*** | 0.066 |  | 0.311*** | 0.064 |
| Constant | -2.2540*** | 0.618 |  | -1.870*** | 0.471 |
| N | 1529 |  |  | 1433 |  |
| R2 | 0.153 |  |  | 0.115 |  |
| *Notes.* Logit regression. Two-tailed test, *p<0.05, **p<0.01, ***p<0.001. | | | | | |

**Table A5: Effect of European identification**

|  | Netherlands | | Spain | |
| --- | --- | --- | --- | --- |
|  | Coef. | S.E. | Coef. | S.E. |
| Foreign recipient | -2.126*** | 0.256 | -1.173*** | 0.259 |
| EU Identification | 0.487* | 0.214 | 0.330 | 0.229 |
| Foreign x EU Identification | 0.759* | 0.333 | -0.099 | 0.295 |
| Age | -0.008 | 0.007 | 0.015** | 0.005 |
| Education | 0.232*** | 0.065 | 0.286*** | 0.062 |
| Female | -0.535** | 0.163 | -0.661*** | 0.124 |
|  |  |  |  |  |
| Constant | -1.433** | 0.474 | -1.624*** | 0.411 |
| N | 1572 |  | 1446 |  |
| R2 | 0.145 |  | 0.093 |  |
| *Notes.* Logit regression. Two-tailed test, *p<0.05, **p<0.01, ***p<0.001. | | | | |

**Table A6: Effect of education controlling for income**

|  | Netherlands | |  | Spain | |
| --- | --- | --- | --- | --- | --- |
|  | Coef. | S.E. |  | Coef. | S.E. |
| Foreign | -2.481*** | 0.635 |  | -1.831*** | 0.504 |
| Education | 0.293** | 0.098 |  | 0.114 | 0.105 |
| Foreign x Education | 0.212 | 0.142 |  | 0.154 | 0.131 |
| Income | -0.029 | 0.031 |  | 0.121*** | 0.027 |
| Age | -0.004 | 0.008 |  | 0.008 | 0.006 |
| Female | -0.58** | 0.177 |  | -0.517*** | 0.138 |
| Constant | -1.383* | 0.583 |  | -0.867 | 0.51 |
| N | 1241 |  |  | 1189 |  |
| R2 | 0.128 |  |  | 0.101 |  |
| *Notes.* Logit regression. Two-tailed test, *p<0.05, **p<0.01, ***p<0.001. | | | | | |

1. Source: OECD 2015. Dutch qualifications matched with ISCED codes. Lower secondary includes VMBO/MBO , upper secondary includes MBO2-4 and HAVO/WVO; Tertiary education includes HBO (technical university) and universities [↑](#footnote-ref-1)
2. Source: OECD 2015. Spanish qualifications matched with ISCED codes. Upper secondary includes formacion profesional / estudios tecnicos. [↑](#footnote-ref-2)
